# Supplementary material
Source: HighWire-hosted journal article supplement (https://gh.bmj.com/content/3/1/e000586)
Supplement: inline-supplementary-material-3 [file inline-supplementary-material-3.pdf]

Inpatient number:

Name of baby:

Birthweight or highest weight: \_\_ . \_\_ \_\_ \_\_ kg

| Medications to be given ONCE only i.e. stat doses or loading doses |              |             |       |                                           |
|--------------------------------------------------------------------|--------------|-------------|-------|-------------------------------------------|
| Medication:                                                        | Dose per kg: | Total Dose: | Route | Sign, date, time when medication is given |
|                                                                    |              |             |       |                                           |
|                                                                    |              |             |       |                                           |
|                                                                    |              |             |       |                                           |
|                                                                    |              |             |       |                                           |
|                                                                    |              |             |       |                                           |

| Baby's age in days:                                                                                                 | Day      |      |      |      |      |      |
|---------------------------------------------------------------------------------------------------------------------|----------|------|------|----------|------|------|----------|------|------|----------|------|------|----------|------|------|----------|------|------|------|------|------|
| Date to be given:                                                                                                   | __/__/__ |      |      | __/__/__ |      |      | __/__/__ |      |      | __/__/__ |      |      | __/__/__ |      |      | __/__/__ |      |      |      |      |      |
| Time to be given:                                                                                                   | 0600     | 1200 | 1800 | 0600     | 1200 | 1800 | 0600     | 1200 | 1800 | 0600     | 1200 | 1800 | 0600     | 1200 | 1800 | 0600     | 1200 | 1800 | 0600 | 1200 | 1800 |
| <b>Medication:</b><br>Dose per kg:<br>Total dose:<br>OD / BD / TDS      IV / IM / PO<br>Start date:      Stop date: |          |      |      |          |      |      |          |      |      |          |      |      |          |      |      |          |      |      |      |      |      |
| <b>Medication:</b><br>Dose per kg:<br>Total dose:<br>OD / BD / TDS      IV / IM / PO<br>Start date:      Stop date: |          |      |      |          |      |      |          |      |      |          |      |      |          |      |      |          |      |      |      |      |      |
| <b>Medication:</b><br>Dose per kg:<br>Total dose:<br>OD / BD / TDS      IV / IM / PO<br>Start date:      Stop date: |          |      |      |          |      |      |          |      |      |          |      |      |          |      |      |          |      |      |      |      |      |
